# Supplementary material for: Splice variants as novel targets in pancreatic ductal adenocarcinoma
Source: PubMed Central journal article supplement (PMC5462735; doi:10.1038/s41598-017-03354-z), 2017-06-07
Supplement: 41598_2017_3354_MOESM1_ESM.pdf [file 41598_2017_3354_MOESM1_ESM.pdf]

## **Splice variants as novel targets in pancreatic ductal adenocarcinoma**

Jun Wang<sup>1</sup>, Laurent Dumartin<sup>1</sup>, Andrea Mafficini<sup>2</sup>, Pinar Ulug<sup>1</sup>, Ajanthah Sangaralingam<sup>1</sup>, Namaa Audi Alamiry<sup>1</sup>, Tomasz P Radon<sup>1</sup>, Roberto Salvia<sup>2</sup>, Rita T Lawlor<sup>2</sup>, Nicholas R Lemoine<sup>1</sup>, Aldo Scarpa<sup>2</sup>, Claude Chelala<sup>1,#</sup> and Tatjana Crnogorac-Jurcevic<sup>1,#</sup>

<sup>1</sup> Centre for Molecular Oncology, Barts Cancer Institute, Queen Mary University of London, London, UK;

<sup>2</sup> ARC-Net Research Centre and Department of Diagnostics and Public Health, Section of Pathology, University and Hospital Trust of Verona, Verona, Italy

#These authors jointly supervised this work

Correspondence and requests for materials should be addressed to J.W. (email: [j.a.wang@qmul.ac.uk](mailto:j.a.wang@qmul.ac.uk)) or T.C.J. (email: [t.c.jurcevic@qmul.ac.uk](mailto:t.c.jurcevic@qmul.ac.uk))

A

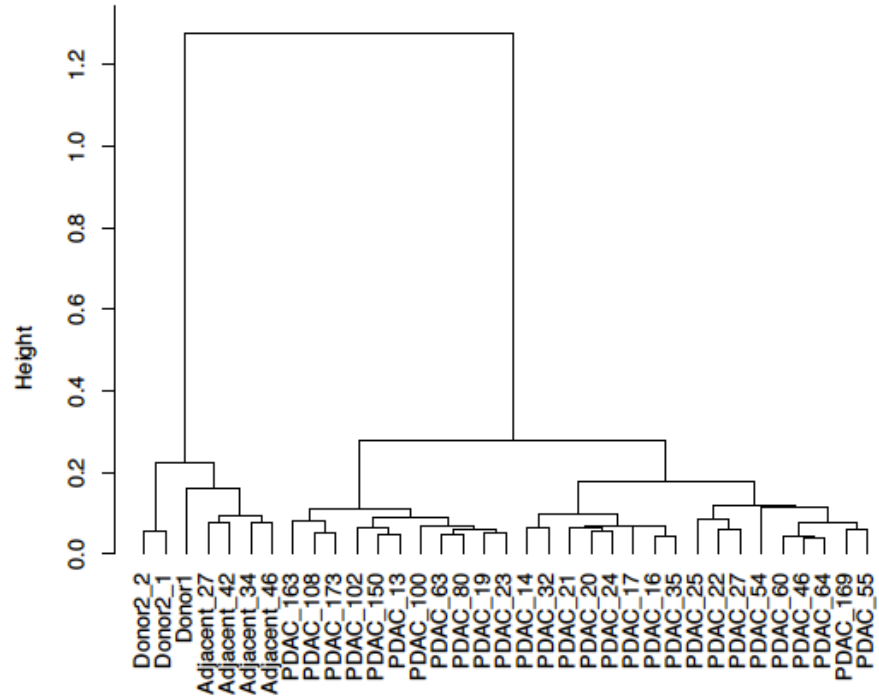

B

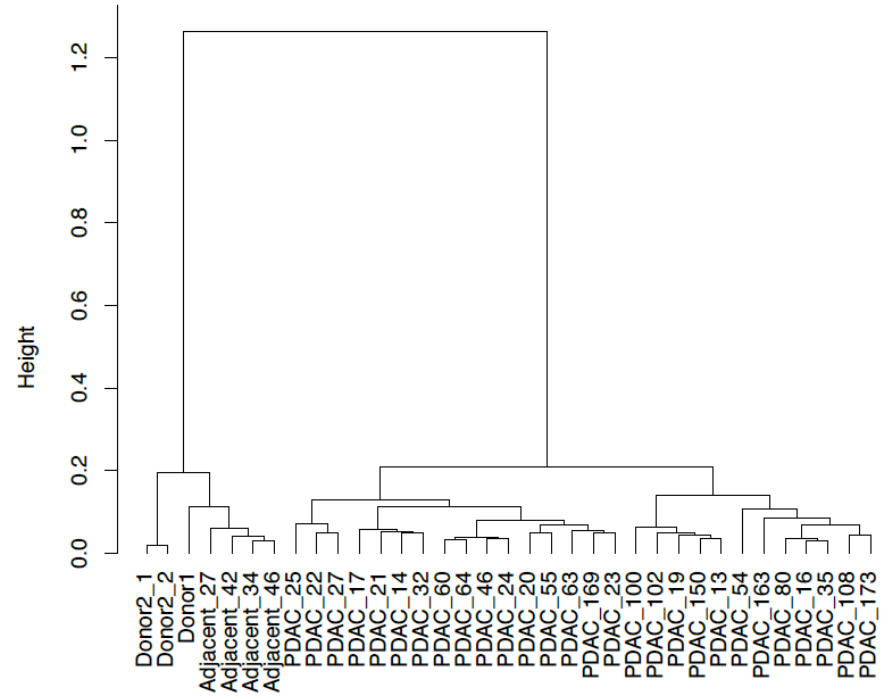

**Figure S1.** Unsupervised hierarchical clustering based on probeset (A) and transcript (B) expression level

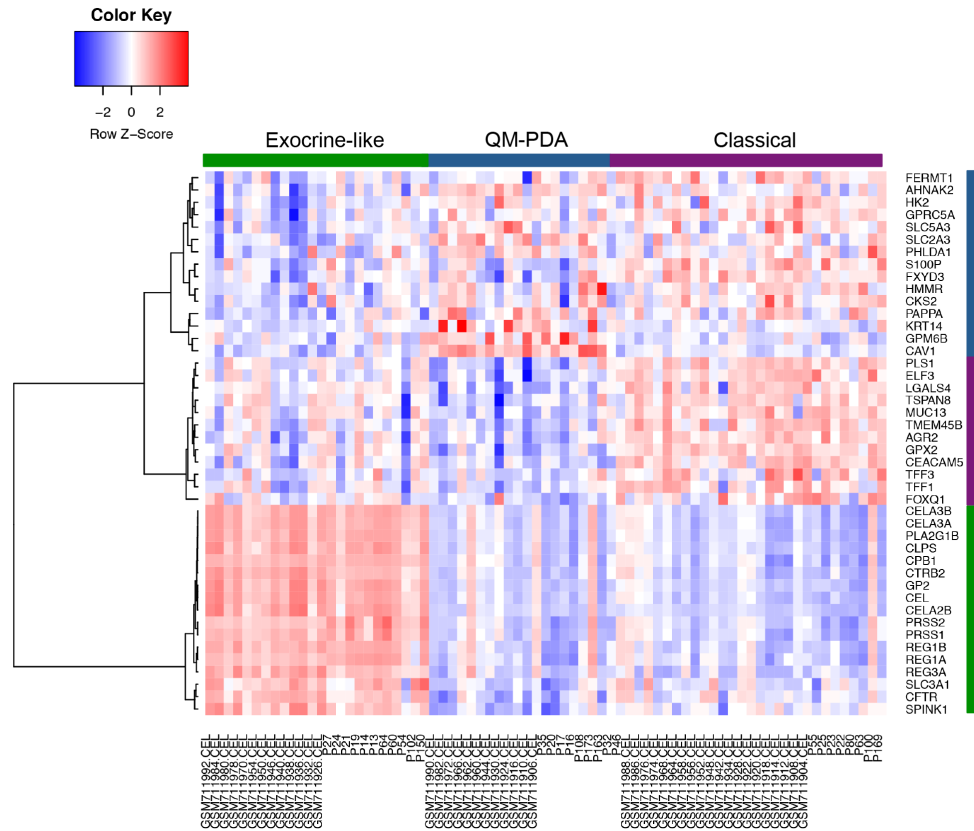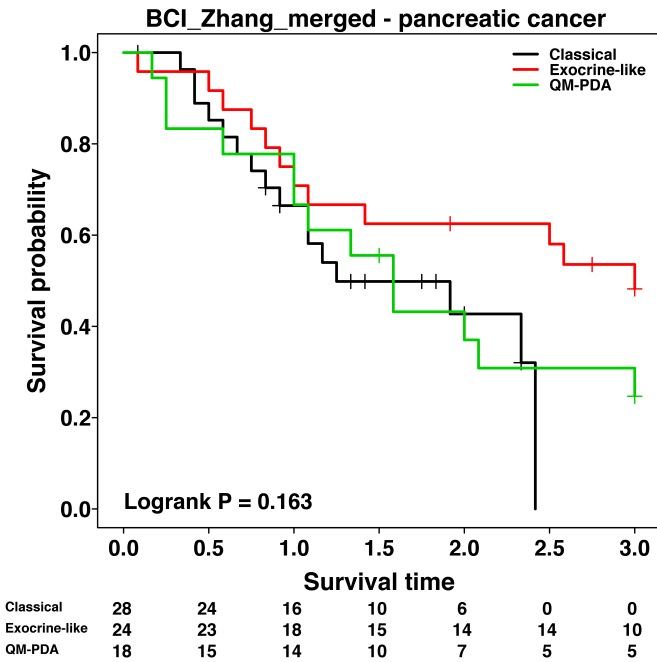

**Figure S2. Gene expression and sample clustering of Collisson signature (62 genes) in BCI and Zhang merged dataset**

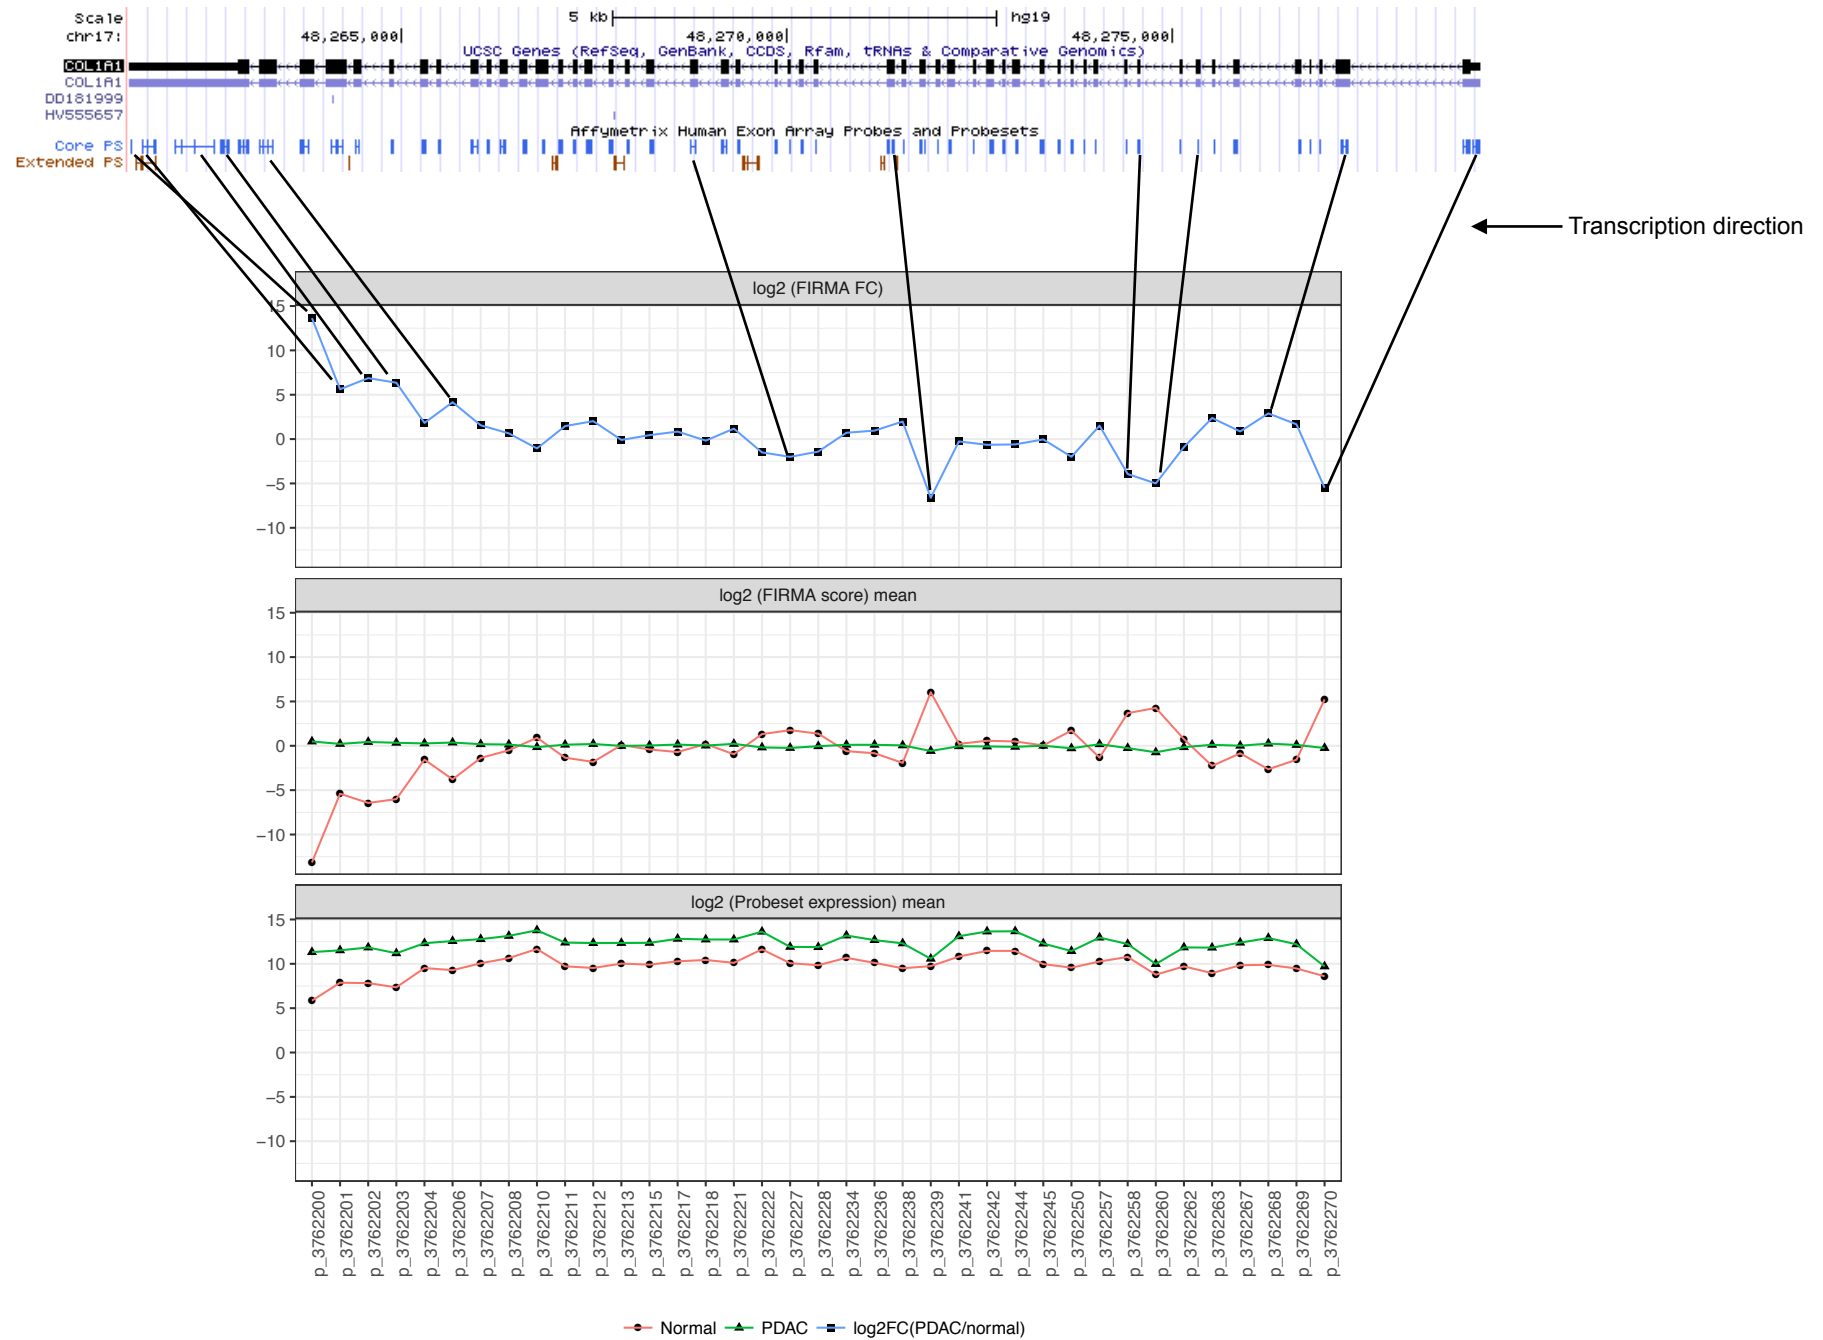

Figure S3A. alternative splicing in COL1A1

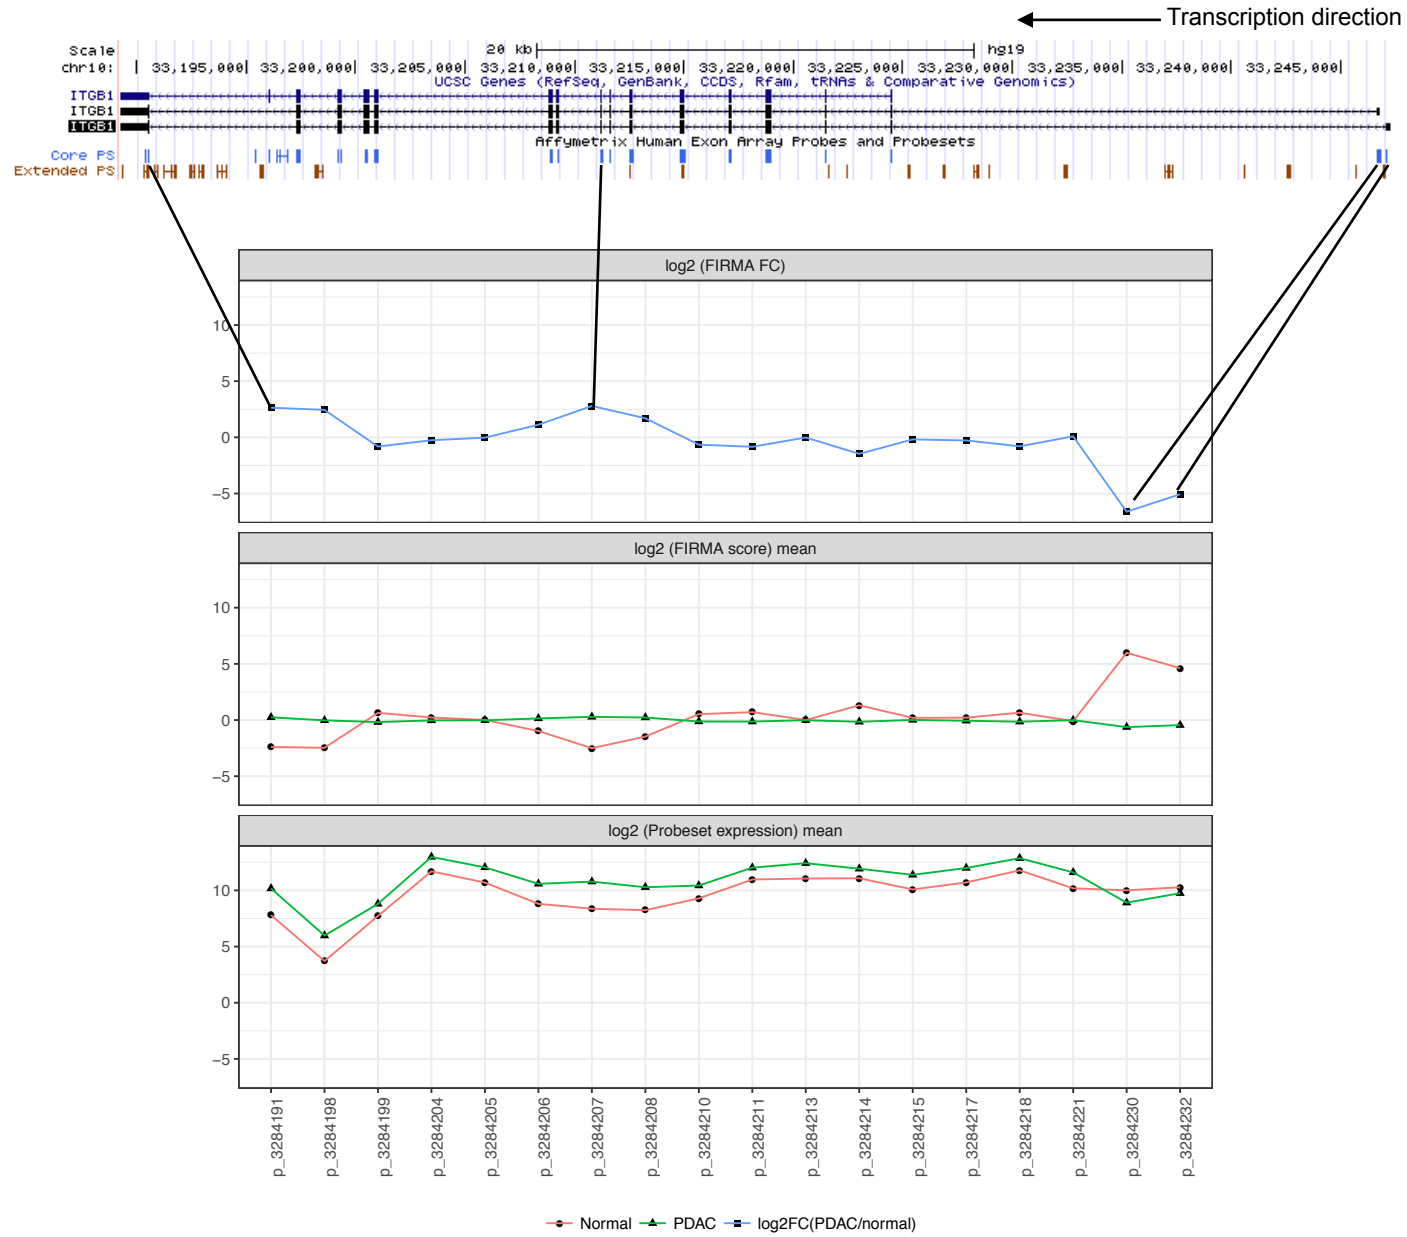

Figure S3B. alternative splicing in ITGB1

A

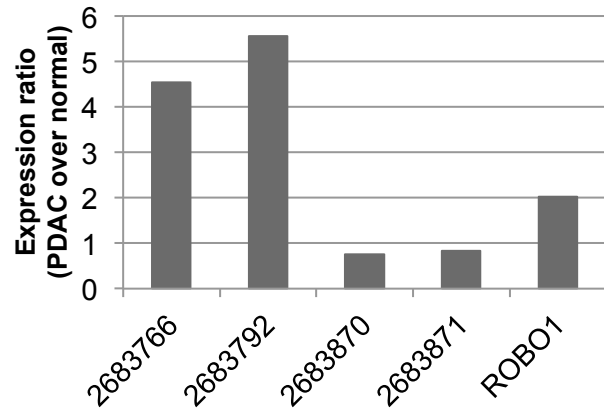

B

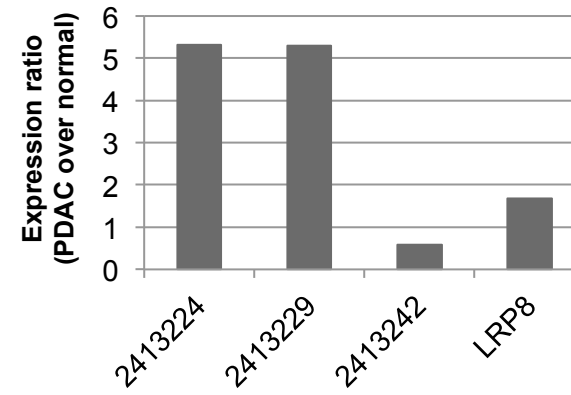

**Figure S4.** The expression ratio (PDAC over normal) of AS probesets and gene for ROBO1 and LRP8

A

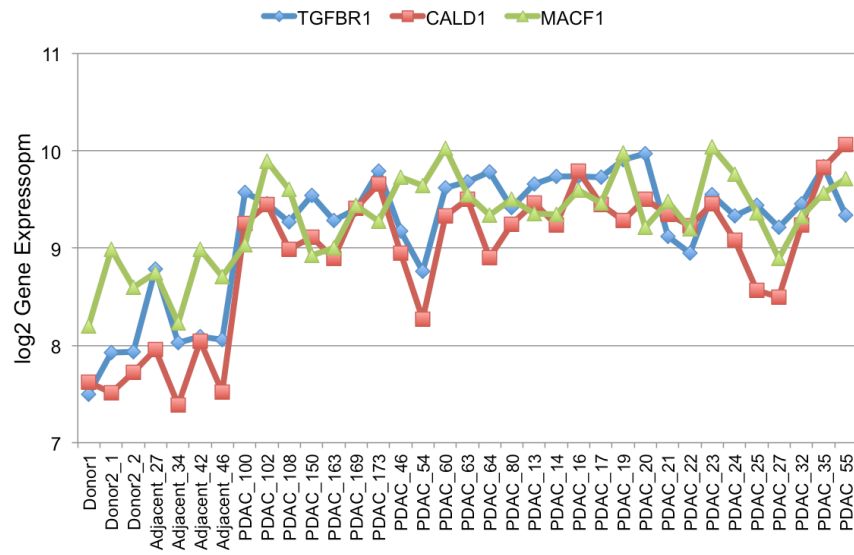

B

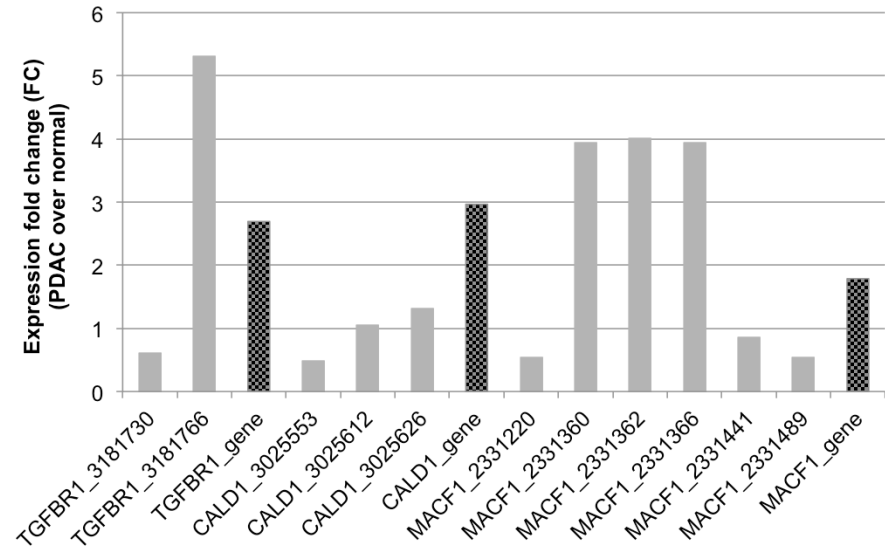

Figure S5A/B. Expression fold changes for TGFBR1, CALD1 and MACF1 in gene and probeset/exon levels

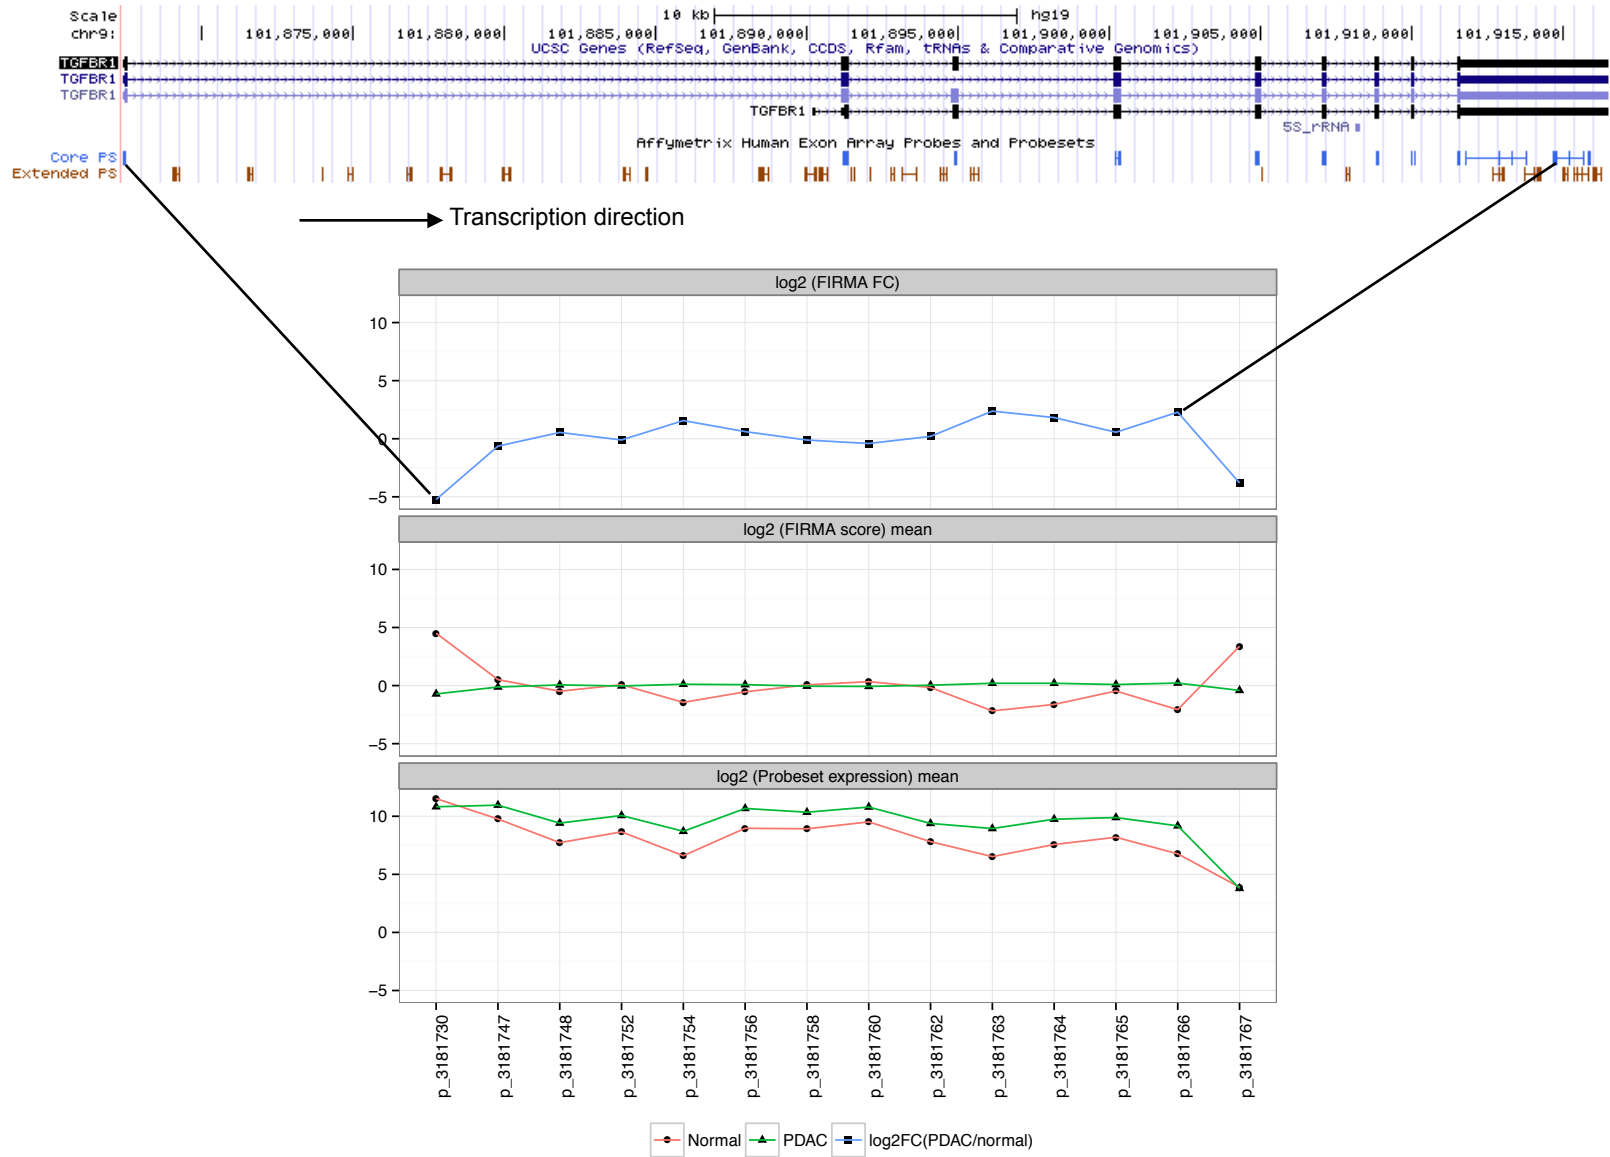

Figure S5C. Alternative splicing in TGFBR1



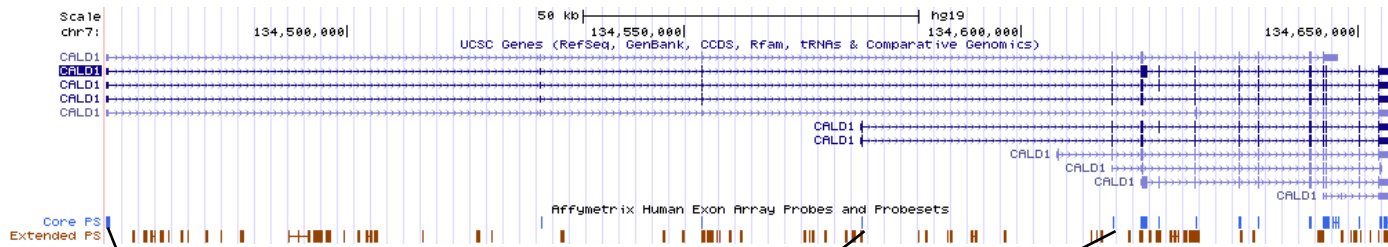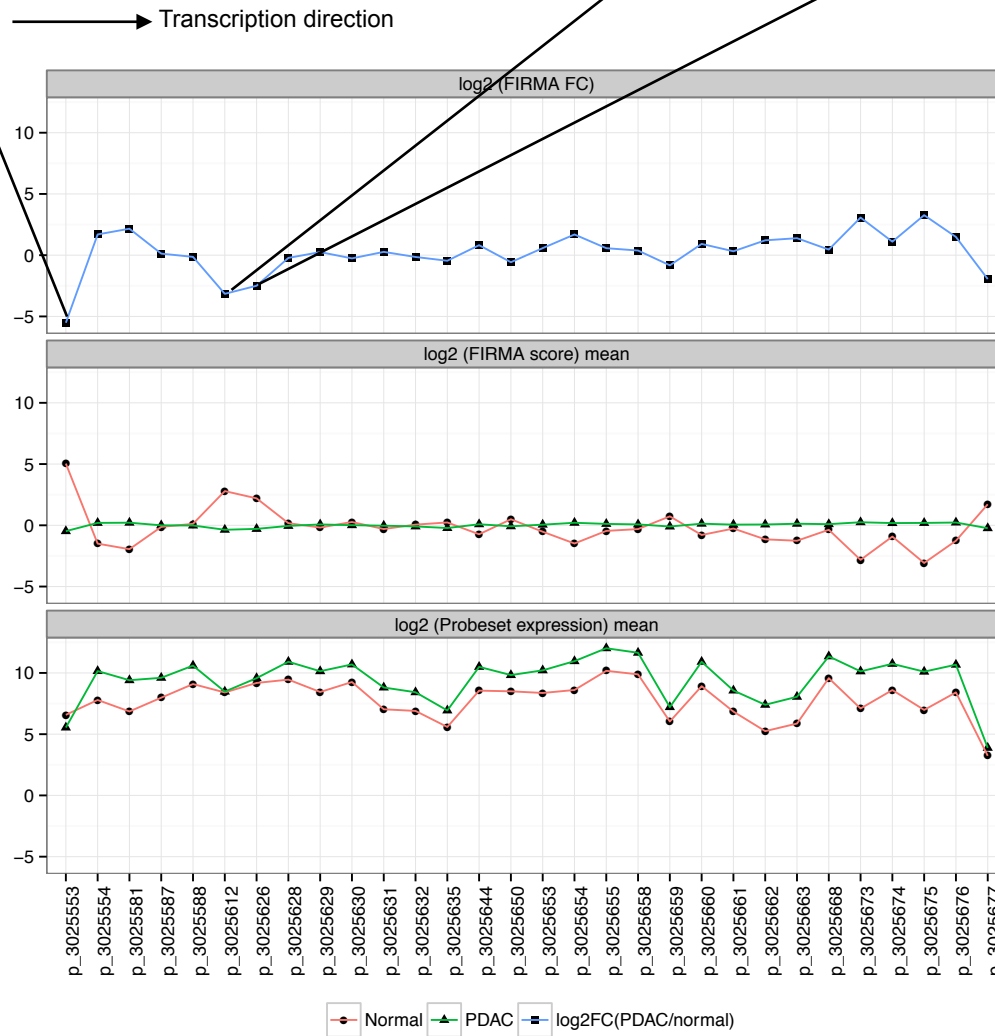

Figure S5D. Alternative splicing in CALD1

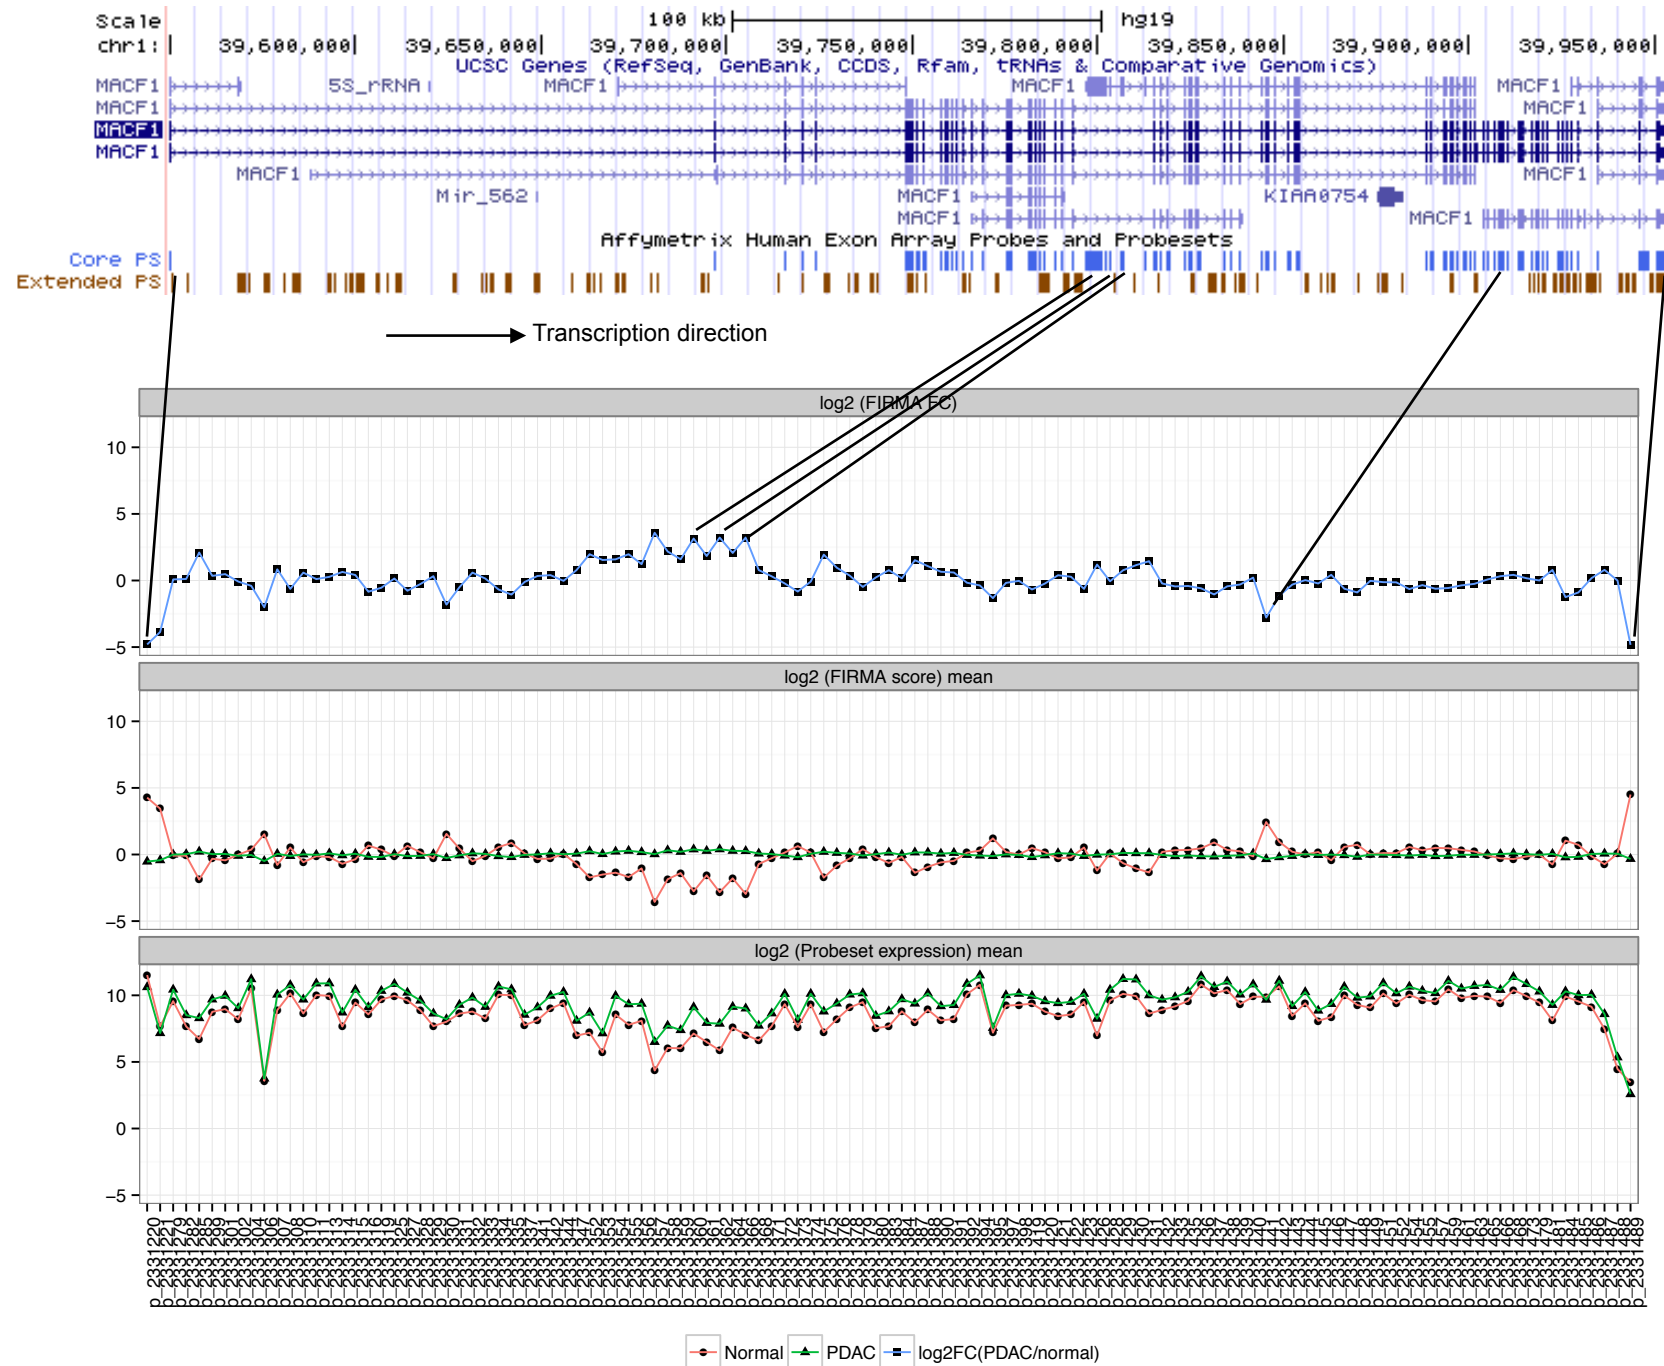

Figure S5E. Alternative splicing in MACF1

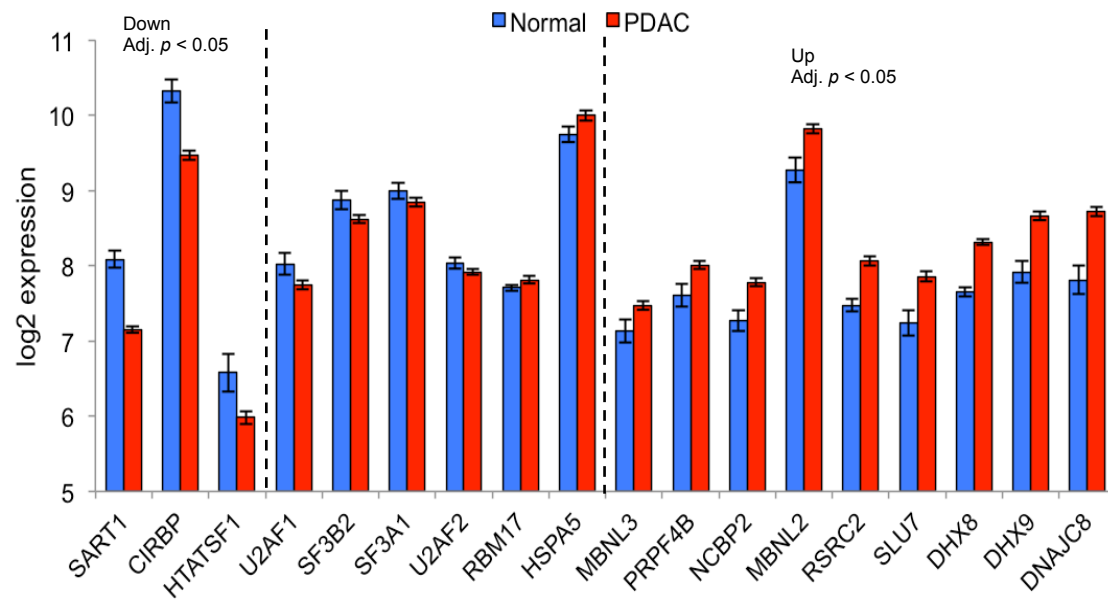

Figure S6. The DE signatures for previously reported spliceosomal genes
